# Supplementary material
Source: ML conference proceedings conference paper supplement (https://proceedings.neurips.cc/paper_files/paper/2021/hash/66be31e4c40d676991f2405aaecc6934-Abstract.html)
Supplement: Supplementary file [file 66be31e4c40d676991f2405aaecc6934-Supplemental.pdf]

---

# Supplementary Material for “Non-Asymptotic Error Bounds for Bidirectional GANs”

---

**Shiao Liu**

Department of Statistics and Actuarial Science, University of Iowa  
Iowa City, IA 52242, USA  
shiao-liu@uiowa.edu

**Yunfei Yang \***

Department of Mathematics, The Hong Kong University of Science and Technology  
Clear Water Bay, Hong Kong, China  
yyangdc@connect.ust.hk

**Jian Huang \***

Department of Statistics and Actuarial Science, University of Iowa  
Iowa City, IA 52242, USA  
jian-huang@uiowa.edu

**Yuling Jiao\***

School of Mathematics and Statistics, Wuhan University  
Wuhan, Hubei, China 430072  
yulingjiaomath@whu.edu.cn

**Yang Wang**

Department of Mathematics, The Hong Kong University of Science and Technology  
Clear Water Bay, Hong Kong, China  
yangwang@ust.hk

In this supplementary material, we first prove Theorem 3.2, and then Theorems 3.1 and 3.3.

## A Notations and Preliminaries

We use  $\sigma$  to denote the ReLU activation function in neural networks, which is  $\sigma(x) = \max\{x, 0\}$ . Without further indication,  $\|\cdot\|$  represents the  $L_2$  norm. For any function  $g$ , let  $\|g\|_\infty = \sup_x \|g(x)\|$ . We use notation  $O(\cdot)$  and  $\tilde{O}(\cdot)$  to express the order of function slightly differently, where  $O(\cdot)$  omits the universal constant not relying on  $d$  while  $\tilde{O}(\cdot)$  omits the constant related to  $d$ . We use  $B_2^d(a)$  to denote  $L_2$  ball in  $\mathbb{R}^d$  with center at  $\mathbf{0}$  and radius  $a$ . Let  $g\#\nu$  be the pushforward distribution of  $\nu$  by function  $g$  in the sense that  $g\#\nu(A) = \nu(g^{-1}(A))$  for any measurable set  $A$ .

The  $r$ -**covering number** of some class  $\mathcal{F}$  w.r.t. norm  $\|\cdot\|$  is the minimum number of  $r$ - $\|\cdot\|$  radius balls needed to cover  $\mathcal{F}$ , which we denote as  $\mathcal{N}(r, \mathcal{F}, \|\cdot\|)$ . We denote  $\mathcal{N}(r, \mathcal{F}, L_2(P_n))$  as the covering number of  $\mathcal{F}$  w.r.t.  $L_2(P_n)$ , which is defined as  $\|f\|_{L_2(P_n)}^2 = \frac{1}{n} \sum_{i=1}^n \|f(X_i)\|^2$  where  $X_1, \dots, X_n$  are the empirical samples. We denote  $\mathcal{N}(r, \mathcal{F}, L_\infty(P_n))$  as the covering number of  $\mathcal{F}$  w.r.t.  $L_\infty(P_n)$ , which is defined as  $\|f\|_{L_\infty(P_n)} = \max_{1 \leq i \leq n} \|f(X_i)\|$ . It is easy to check that

$$\mathcal{N}(r, \mathcal{F}, L_2(P_n)) \leq \mathcal{N}(r, \mathcal{F}, L_\infty(P_n)) \leq \mathcal{N}(r, \mathcal{F}, \|\cdot\|_\infty).$$

---

\*Corresponding authors

## B Restriction on the domain of uniformly bounded Lipschitz function class $\mathcal{F}^1$

So far, most of the related works assume that the target distribution  $\mu$  is supported on a compact set, for example Chen et al. (2020) and Liang (2020). To remove the compact support assumption, we need to assume Assumption 1, i.e., the tails of the target  $\mu$  and the reference  $\nu$  are subexponential. Define  $\mathcal{F}_n^1 := \{f|_{B_2^{d+1}(\sqrt{2}\log n)} : f \in \mathcal{F}^1\}$ . In this section, we show that proving Theorem 3.2 is equivalent to establishing the same convergence rate but with the domain restricted function class  $\mathcal{F}_n^1$  as the evaluation class.

Under Assumption 1 and by the Markov inequality, we have

$$P_\nu(\|z\| > \log n) \leq \frac{\mathbb{E}_\nu \|z\| \mathbb{1}_{\{\|z\| > \log n\}}}{\log n} = O(n^{-\frac{(\log n)^\delta}{d}} / \log n) \quad (\text{B.1})$$

The Dudley distance between latent joint distribution  $\hat{\nu}$  and data joint distribution  $\hat{\mu}$  is defined as

$$d_{\mathcal{F}^1}(\hat{\nu}, \hat{\mu}) = \sup_{f \in \mathcal{F}^1} \mathbb{E}f(\hat{g}(z), z) - \mathbb{E}f(x, \hat{e}(x)) \quad (\text{B.2})$$

The first term above can be decomposed as

$$\mathbb{E}f(\hat{g}(z), z) = \mathbb{E}f(\hat{g}(z), z) \mathbb{1}_{\|z\| \leq \log n} + \mathbb{E}f(\hat{g}(z), z) \mathbb{1}_{\|z\| > \log n} \quad (\text{B.3})$$

For any  $f \in \mathcal{F}^1$  and fixed point  $z_0$  such that  $\|z_0\| \leq \log n$ , due to the Lipschitzness of  $f$ , the second term above satisfies

$$\begin{aligned} |\mathbb{E}f(\hat{g}(z), z) \mathbb{1}_{\|z\| > \log n}| &\leq |\mathbb{E}f(\hat{g}(z), z) \mathbb{1}_{\|z\| > \log n} - \mathbb{E}f(\hat{g}(z_0), z_0) \mathbb{1}_{\|z\| > \log n}| \\ &\quad + |\mathbb{E}f(\hat{g}(z_0), z_0) \mathbb{1}_{\|z\| > \log n}| \\ &\leq \mathbb{E}\|(\hat{g}(z) - \hat{g}(z_0), z - z_0)\| \mathbb{1}_{\|z\| > \log n} + BP_\nu(\|z\| > \log n) \\ &\leq \mathbb{E}(\|\hat{g}(z) - \hat{g}(z_0)\| + \|z - z_0\|) \mathbb{1}_{\|z\| > \log n} + BP_\nu(\|z\| > \log n) \\ &\leq 2(\log n)P_\nu(\|z\| > \log n) + \mathbb{E}\|z - z_0\| \mathbb{1}_{\|z\| > \log n} + BP_\nu(\|z\| > \log n) \\ &= O(n^{-\frac{(\log n)^\delta}{d}}) \end{aligned}$$

where the second inequality is due to Lipschitzness and boundedness of  $f$ , and the last inequality is due to Assumption 1, (B.1), and the boundedness condition of  $\hat{g}$ . In the first term in (B.3),  $f$  only acts on the increasing  $L_2$  ball  $B_2^d(\sqrt{2}\log n)$  because of Condition 1 and the indicator function  $\mathbb{1}_{\{\|z\| \leq \log n\}}$ . Similarly, we can apply the same procedure to the second term in (B.2). Therefore, it is still an equivalent problem if we restrict the domain of  $\mathcal{F}^1$  on  $B_2^d(\sqrt{2}\log n)$ . Hence, in order to prove the estimation error rate in Theorem 3.2, we only need to show that for the restricted evaluation function class  $\mathcal{F}_n^1$ , we have

$$\mathbb{E}d_{\mathcal{F}_n^1}(\hat{\nu}, \hat{\mu}) \leq C_0 \sqrt{dn}^{-\frac{1}{d+1}} (\log n)^{1+\frac{1}{d+1}} \wedge C_d n^{-\frac{1}{d+1}} \log n$$

Due to this fact, to keep notation simple, we are going to denote  $\mathcal{F}_n^1$  as  $\mathcal{F}^1$  in the following sections.

**Remark 1.** The restriction on  $\mathcal{F}^1$  is technically necessary for calculating the covering number of  $\mathcal{F}^1$  later we will see the use of it when bounding the stochastic error  $\mathcal{E}_3$  and  $\mathcal{E}_4$  below.

## C Stochastic errors

### C.1 Bounding $\mathcal{E}_3$ and $\mathcal{E}_4$

The stochastic errors  $\mathcal{E}_3$  and  $\mathcal{E}_4$  quantify how close the empirical distributions and the true latent joint distribution (data joint distribution) are with the Lipschitz class  $\mathcal{F}^1$  as the evaluation class under IPM. We apply the results in Lemma C.1 to bound  $\mathcal{E}_3$  and  $\mathcal{E}_4$ . We introduce two methods to bound  $\max\{\mathcal{E}_3, \mathcal{E}_4\}$ , which gives two different upper bounds for  $\max\{\mathcal{E}_3, \mathcal{E}_4\}$ . They both utilize the following lemma, which we shall prove later. More detailed description about the refined Dudley inequality can be found in Srebro and Sridharan (2010) and Schreuder (2020).

**Lemma C.1** (Refined Dudley Inequality). *For a symmetric function class  $\mathcal{F}$  with  $\sup_{f \in \mathcal{F}} \|f\|_\infty \leq M$ , we have*

$$\mathbb{E}[d_{\mathcal{F}}(\hat{\mu}_n, \mu)] \leq \inf_{0 < \delta < M} \left( 4\delta + \frac{12}{\sqrt{n}} \int_\delta^M \sqrt{\log \mathcal{N}(\epsilon, \mathcal{F}, \|\cdot\|_\infty)} d\epsilon \right).$$

**Remark 2.** *The original Dudley inequality (Dudley, 1967; Van der Vaart and Wellner, 1996) suffers from the problem that if the covering number  $\mathcal{N}(\epsilon, \mathcal{F}, \|\cdot\|_\infty)$  increases too fast as  $\epsilon$  goes to 0, then the upper bound can be infinite. The improved Dudley inequality circumvents this problem by only allowing  $\epsilon$  to integrate from  $\delta > 0$ , which also indicates that  $\mathbb{E}\mathcal{E}_3$  scales with the covering number  $\mathcal{N}(\epsilon, \mathcal{F}^1, \|\cdot\|_\infty)$ .*

### C.1.1 The first method (explicit constant)

The first method provides an explicit constant depending on  $d$  at the expense of the higher order of  $\log n$  in the upper bounds. It utilizes the next lemma (Gottlieb et al., 2013, Lemma 6), which turns the problem of bounding the covering number of a Lipschitz function class into the one bounding the covering number of the domain defined for the function class.

**Lemma C.2** (Gottlieb et al. (2013)). *Let  $\mathcal{F}^L$  be the collection of  $L$ -Lipschitz functions mapping the metric space  $(\mathcal{X}, \rho)$  to  $[0, 1]$ . Then the covering number of  $\mathcal{F}^L$  can be estimated in terms of the covering number of  $\mathcal{X}$  with respect to  $\rho$  as follows.*

$$\mathcal{N}(\epsilon, \mathcal{F}^L, \|\cdot\|_\infty) \leq \left(\frac{8}{\epsilon}\right)^{\mathcal{N}(\epsilon/8L, \mathcal{X}, \rho)}.$$

Now we apply Lemma C.2 to bound the covering number for the 1-Lipschitz class  $\mathcal{N}(\epsilon, \mathcal{F}^1, \|\cdot\|_\infty)$  by bounding the covering number for its domain  $\mathcal{N}(\epsilon, B_2^{d+1}(\sqrt{2} \log n), \|\cdot\|_2)$ . Define a new function class  $\mathcal{F}^{\frac{1}{2B}}$  as

$$\mathcal{F}^{\frac{1}{2B}} := \left\{ \frac{f + B}{2B} : f \in \mathcal{F}^1 \right\}.$$

Recall that  $\mathcal{F}^1$  is restricted on  $B_2^{d+1}(\sqrt{2} \log n)$ . Obviously,  $\mathcal{F}^{\frac{1}{2B}}$  is a  $\frac{1}{2B}$ -Lipschitz function class :  $B_2^{d+1}(\sqrt{2} \log n) \mapsto [0, 1]$ . A direct application of Lemma C.2 shows that

$$\mathcal{N}(\epsilon, \mathcal{F}^{\frac{1}{2B}}, \|\cdot\|_\infty) \leq \left(\frac{8}{\epsilon}\right)^{\mathcal{N}(\epsilon B/4, B_2^{d+1}(\sqrt{2} \log n), \|\cdot\|_2)}. \quad (\text{C.1})$$

By the definition of  $\mathcal{F}^{\frac{1}{2B}}$ , the covering numbers satisfy

$$\mathcal{N}(2B\epsilon, \mathcal{F}^1, \|\cdot\|_\infty) = \mathcal{N}(\epsilon, \mathcal{F}^{\frac{1}{2B}}, \|\cdot\|_\infty). \quad (\text{C.2})$$

Note that  $B_2^{d+1}(\sqrt{2} \log n)$  is a subset of  $[-\sqrt{2} \log n, \sqrt{2} \log n]^d$ , and  $[-\sqrt{2} \log n, \sqrt{2} \log n]^d$  can be covered with finite  $\epsilon$ -balls in  $\mathbb{R}^d$  that cover the small hypercube with side length  $2\epsilon/\sqrt{d}$ . It follows that

$$\mathcal{N}(\epsilon, B_2^{d+1}(\sqrt{2} \log n), \|\cdot\|_2) \leq \left( \frac{\sqrt{2(d+1)} \log n}{\epsilon} \right)^{d+1}. \quad (\text{C.3})$$

Combining (C.1), (C.2) and (C.3), we obtain an upper bound for the covering number of the 1-Lipschitz class  $\mathcal{F}^1$

$$\log \mathcal{N}(\epsilon, \mathcal{F}^1, \|\cdot\|_\infty) \leq \left( \frac{8\sqrt{2(d+1)} \log n}{\epsilon} \right)^{d+1} \log \frac{16B}{\epsilon}. \quad (\text{C.4})$$

With the upper bound for the covering entropy in (C.4), a direct application of Lemma C.1 (see Section E for details) by taking  $\delta = 8\sqrt{2(d+1)}n^{-\frac{1}{d+1}}(\log n)^{1+\frac{1}{d+1}}$  leads to

$$\max\{\mathbb{E}\mathcal{E}_3, \mathbb{E}\mathcal{E}_4\} = O\left(\sqrt{dn}^{-\frac{1}{d+1}}(\log n)^{1+\frac{1}{d+1}} + n^{-\frac{1}{d+1}}(\log n)^{1+\frac{1}{d+1}}\right) \quad (\text{C.5})$$

$$= O\left(\sqrt{dn}^{-\frac{1}{d+1}}(\log n)^{1+\frac{1}{d+1}}\right). \quad (\text{C.6})$$

### C.1.2 The second method (better order of $\log n$ )

We now consider the second method that leads to a better order for the  $\log n$  term in the upper bound at the expense of explicitness of the constant related to  $d$ . The next lemma directly provides an upper bound for the covering number of Lipschitz class but with an implicit constant related to  $d$ . It is a straightforward corollary of Van der Vaart and Wellner (1996, Theorem 2.7.1).

**Lemma C.3.** *Let  $\mathcal{X}$  be a bounded, convex subset of  $\mathbb{R}^d$  with nonempty interior. There exists a constant  $c_d$  depending only on  $d$  such that*

$$\log \mathcal{N}(\epsilon, \mathcal{F}^1(\mathcal{X}), \|\cdot\|_\infty) \leq c_d \lambda(\mathcal{X}^1) \left(\frac{1}{\epsilon}\right)^d$$

for every  $\epsilon > 0$ , where  $\mathcal{F}^1(\mathcal{X})$  is the 1-Lipschitz function class defined on  $\mathcal{X}$ , and  $\lambda(\mathcal{X}^1)$  is the Lebesgue measure of the set  $\{x : \|x - \mathcal{X}\| < 1\}$ .

Applying Lemmas C.1 and C.3 (see Section E for details) by taking  $\delta = n^{-\frac{1}{d+1}} \log n$  yields

$$\max\{\mathbb{E}\mathcal{E}_3, \mathbb{E}\mathcal{E}_4\} = O\left(C_d n^{-\frac{1}{d+1}} \log n\right), \quad (\text{C.7})$$

where  $C_d$  is some constant depending on  $d$ . Combining (C.6) and (C.7), we get

$$\max\{\mathbb{E}\mathcal{E}_3, \mathbb{E}\mathcal{E}_4\} = O\left(C_d n^{-\frac{1}{d+1}} \log n \wedge \sqrt{d} n^{-\frac{1}{d+1}} (\log n)^{1+\frac{1}{d+1}}\right). \quad (\text{C.8})$$

**Remark 3.** *Here, we have a tradeoff between the logarithmic factor  $\log n$  and the explicitness of the constant depending on  $d$ . If we want an explicit constant depending on  $d$ , then we have the factor  $(\log n)^{1+\frac{1}{d+1}}$  in the upper bound. Later we will see that  $\mathbb{E}\mathcal{E}_3$  and  $\mathbb{E}\mathcal{E}_4$  are the dominating terms in the four error terms, hence the explicitness of the corresponding constant becomes important. Therefore, we list two different methods here to bound  $\mathbb{E}\mathcal{E}_3$  and  $\mathbb{E}\mathcal{E}_4$ .*

## C.2 Combination of the four error terms

With all the upper bounds for the four different error terms obtained above, next we consider  $\mathcal{E}_1$ - $\mathcal{E}_4$  simultaneously to obtain an overall convergence rate. First, recall how we bound  $\mathcal{E}_1$  and  $\mathcal{E}_4$ . With Lemma 4.2, we have

$$\mathcal{E}_1 = O\left(\sqrt{d}(W_1 L_1)^{-\frac{2}{d+1}} \log n\right). \quad (\text{C.9})$$

To control  $\mathcal{E}_1$  while keeping the architecture of discriminator class  $\mathcal{F}_{NN}$  as small as possible, we let  $W_1 L_1 = \lceil \sqrt{n} \rceil$ , so that  $\mathcal{E}_1 = O\left(\sqrt{d} n^{-\frac{1}{d+1}} \log n\right)$  dominated by  $\mathcal{E}_3$  and  $\mathcal{E}_4$ .

By Theorem 4.3, we can choose the architectures of generator and encoder classes accordingly to perfectly control  $\mathcal{E}_2$ , i.e.  $\mathcal{E}_2 = 0$ .

We note that because we imposed Condition 1 on both generator and encoder classes, Theorem 4.3 can not be applied if we have some  $\|x_i\|$  or  $\|z_i\|$  greater than  $\log n$ , in which case  $\mathcal{E}_2$  can not be perfectly controlled. But we can still handle this case by considering the probability of the bad set.

Under Condition 1, on the nice set  $A := \{\max_{1 \leq i \leq n} \|x_i\| \leq \log n\} \cap \{\max_{1 \leq i \leq n} \|z_i\| \leq \log n\}$ , we have  $\mathcal{E}_2 = 0$ . Probability of the nice set  $A$  has the following lower bound.

$$\begin{aligned} P(A) &= P_\mu(\|x_i\| \leq \log n)^n \cdot P_\nu(\|z_i\| \leq \log n)^n \\ &\geq (1 - C n^{-\frac{(\log n)^\delta}{d}})^{2n}, \text{ for some constant } C > 0 \text{ by Assumption 1} \\ &\geq 1 - C n^{-\frac{(\log n)^\delta}{d}} \cdot (2n), \text{ for large } n. \end{aligned}$$

The bad set  $A^c$  is where  $\mathcal{E}_2 > 0$ , which has the probability upper bound as follows.

$$\begin{aligned} P(A^c) &\leq C n^{-\frac{(\log n)^\delta}{d}} \cdot (2n) \\ &= O\left(n^{-\frac{(\log n)^{\delta'}}{d}}\right), \text{ for any } \delta' < \delta. \end{aligned}$$

In Assumption 1, the  $(\log n)^\delta$  factor was to make the tail of the target  $\mu$  strictly subexponential, which leads to  $P(A^c) \rightarrow 0$ , while the exponential tail or heavier will cause the undesired result  $P(A^c) \rightarrow 1$ .

Now we are ready to obtain the desired result in Theorem 3.2. The nice set  $A = \{\max_{1 \leq i \leq n} \|x_i\| \leq \log n\} \cap \{\max_{1 \leq i \leq n} \|z_i\| \leq \log n\}$  is where  $\mathcal{E}_2 = 0$ . By combining the results discussed above, we have

$$\begin{aligned} \mathbb{E}d_{\mathcal{F}^1}(\hat{\nu}, \hat{\mu}) &= 2\mathcal{E}_1 + \mathcal{E}_2 \mathbb{1}_A + \mathcal{E}_2 \mathbb{1}_{A^c} + \mathbb{E}\mathcal{E}_3 + \mathbb{E}\mathcal{E}_4 \\ &\leq O\left(\sqrt{dn}^{-\frac{1}{d+1}} \log n + 0 + 2BP_\mu(A^c) + \sqrt{dn}^{-\frac{1}{d+1}} (\log n)^{1+\frac{1}{d+1}} \wedge C_d n^{-\frac{1}{d+1}} \log n\right) \\ &= O\left(\sqrt{dn}^{-\frac{1}{d+1}} (\log n)^{1+\frac{1}{d+1}} \wedge C_d n^{-\frac{1}{d+1}} \log n + n^{-\frac{(\log n)^{\delta'}}{d}}\right) \\ &= O\left(\sqrt{dn}^{-\frac{1}{d+1}} (\log n)^{1+\frac{1}{d+1}} \wedge C_d n^{-\frac{1}{d+1}} \log n\right), \end{aligned}$$

which completes the proof of Theorem 3.2.

## D Proof of Inequality (4.2)

For ease of reference, we restate inequality (4.2) as the following lemma.

**Lemma 4.2.** *For any symmetric function classes  $\mathcal{F}$  and  $\mathcal{H}$ , denote the approximation error  $\mathcal{E}(\mathcal{H}, \mathcal{F})$  as*

$$\mathcal{E}(\mathcal{H}, \mathcal{F}) := \sup_{h \in \mathcal{H}} \inf_{f \in \mathcal{F}} \|h - f\|_\infty,$$

then for any probability distributions  $\mu$  and  $\nu$ ,

$$d_{\mathcal{H}}(\mu, \nu) - d_{\mathcal{F}}(\mu, \nu) \leq 2\mathcal{E}(\mathcal{H}, \mathcal{F}).$$

*Proof of Lemma 4.2.* By the definition of supremum, for any  $\epsilon > 0$ , there exists  $h_\epsilon \in \mathcal{H}$  such that

$$\begin{aligned} d_{\mathcal{H}}(\mu, \nu) &:= \sup_{h \in \mathcal{H}} [\mathbb{E}_\mu h - \mathbb{E}_\nu h] \\ &\leq \mathbb{E}_\mu h_\epsilon - \mathbb{E}_\nu h_\epsilon + \epsilon \\ &= \inf_{f \in \mathcal{F}} [\mathbb{E}_\mu(h_\epsilon - f) - \mathbb{E}_\nu(h_\epsilon - f) + \mathbb{E}_\mu(f) - \mathbb{E}_\nu(f)] + \epsilon \\ &\leq 2 \inf_{f \in \mathcal{F}} \|h_\epsilon - f\|_\infty + d_{\mathcal{F}}(\mu, \nu) + \epsilon \\ &\leq 2\mathcal{E}(\mathcal{H}, \mathcal{F}) + d_{\mathcal{F}}(\mu, \nu) + \epsilon, \end{aligned}$$

where the last line is due to the definition of  $\mathcal{E}(\mathcal{H}, \mathcal{F})$ . □

It is easy to check that if we replace  $d_{\mathcal{H}}(\mu, \nu)$  by  $\hat{d}_{\mathcal{H}}(\mu, \nu) := \sup_{h \in \mathcal{H}} [\hat{\mathbb{E}}_\mu h - \hat{\mathbb{E}}_\nu h]$ , Lemma 4.2 still holds.

## E Bounding $\mathbb{E}\mathcal{E}_3$ and $\mathbb{E}\mathcal{E}_4$

### E.1 Method One

With the upper bound for the covering entropy (C.4), i.e.

$$\log \mathcal{N}(\epsilon, \mathcal{F}^1, \|\cdot\|_\infty) \leq \left( \frac{8\sqrt{2(d+1)} \log n}{\epsilon} \right)^{d+1} \log \frac{16B}{\epsilon}$$

and  $\delta = 8\sqrt{2(d+1)}n^{-\frac{1}{d+1}}(\log n)^{1+\frac{1}{d+1}}$ , applying Lemma C.1 we have

$$\begin{aligned}\mathbb{E}\mathcal{E}_3 &= O\left(\delta + n^{-\frac{1}{2}} \int_{\delta}^B \left(\frac{8\sqrt{2(d+1)}\log n}{\epsilon}\right)^{\frac{d+1}{2}} \left(\log \frac{16B}{\epsilon}\right)^{\frac{1}{2}} d\epsilon\right) \\ &= O\left(\delta + n^{-\frac{1}{2}}(8\sqrt{2(d+1)}\log n)^{\frac{d+1}{2}} \left(\frac{\log n}{d+1}\right)^{\frac{1}{2}} \delta^{1-\frac{d+1}{2}}\right) \\ &= O\left(\sqrt{d}n^{-\frac{1}{d+1}}(\log n)^{1+\frac{1}{d+1}} + n^{-\frac{1}{d+1}}(\log n)^{1+\frac{1}{d+1}}\right) \\ &= O\left(\sqrt{d}n^{-\frac{1}{d+1}}(\log n)^{1+\frac{1}{d+1}}\right),\end{aligned}$$

where the second equality is due to

$$\log \frac{16B}{\epsilon} = O\left(\log \frac{1}{\epsilon}\right) = O\left(\log \left(\frac{n^{\frac{1}{d+1}}}{8\sqrt{2(d+1)}(\log n)^{1+\frac{1}{d+1}}}\right)\right) = O\left(\log n^{\frac{1}{d+1}}\right),$$

and the third equality follows from simple algebra.

## E.2 Method Two

By Lemma C.3, we have

$$\log \mathcal{N}(\epsilon, \mathcal{F}^1, \|\cdot\|_{\infty}) \leq c_d \left(\frac{\log n}{\epsilon}\right)^{d+1}.$$

Taking  $\delta = n^{-\frac{1}{d+1}} \log n$  and applying Lemma C.1, we obtain

$$\begin{aligned}\mathbb{E}\mathcal{E}_3 &= O\left(\delta + \left(\frac{c_d}{n}\right)^{\frac{1}{2}}(\log n)^{\frac{d+1}{2}} \int_{\delta}^M \left(\frac{1}{\epsilon}\right)^{\frac{d+1}{2}} d\epsilon\right) \\ &= \tilde{O}\left(\delta + n^{-\frac{1}{2}}(\log n)^{\frac{d+1}{2}} \delta^{1-\frac{d+1}{2}}\right) \\ &= \tilde{O}\left(n^{-\frac{1}{d+1}} \log n\right),\end{aligned}$$

where  $\tilde{O}(\cdot)$  omitted the constant related to  $d$ .

## F Proof of Lemma C.1

For completeness we provide a proof of the refined Dudley's inequality in Lemma C.1. We apply the standard symmetrization and chaining technics in the proof, see, for example, Van der Vaart and Wellner (1996).

*Proof.* Let  $Y_1, \dots, Y_n$  be random samples from  $\mu$  which are independent of  $X_i$ 's. Then we have

$$\begin{aligned}\mathbb{E}d_{\mathcal{F}}(\hat{\mu}_n, \mu) &= \mathbb{E}\sup_{f \in \mathcal{F}} \left[\frac{1}{n} \sum_{i=1}^n f(X_i) - \mathbb{E}f(X_i)\right] \\ &= \mathbb{E}\sup_{f \in \mathcal{F}} \left[\frac{1}{n} \sum_{i=1}^n f(X_i) - \mathbb{E}\frac{1}{n} \sum_{i=1}^n f(Y_i)\right] \\ &\leq \mathbb{E}_{X, Y} \sup_{f \in \mathcal{F}} \left[\frac{1}{n} \sum_{i=1}^n f(X_i) - \frac{1}{n} \sum_{i=1}^n f(Y_i)\right] \\ &= \mathbb{E}_{X, Y} \sup_{f \in \mathcal{F}} \left[\frac{1}{n} \sum_{i=1}^n \epsilon_i (f(X_i) - f(Y_i))\right] \\ &\leq 2\mathbb{E}\hat{\mathcal{R}}_n(\mathcal{F})\end{aligned}$$

where the first inequality is due to Jensen inequality, and the third equality is because that  $(f(X_i) - f(Y_i))$  has symmetric distribution.

Let  $\alpha_0 = M$  and for any  $j \in \mathbb{N}_+$  let  $\alpha_j = 2^{-j}M$ . For each  $j$ , let  $T_i$  be a  $\alpha_i$ -cover of  $\mathcal{F}$  w.r.t.  $L_2(P_n)$  such that  $|T_i| = \mathcal{N}(\alpha_i, \mathcal{F}, L_2(P_n))$ . For each  $f \in \mathcal{F}$  and  $j$ , pick a function  $\hat{f}_i \in T_i$  such that  $\|\hat{f}_i - f\|_{L_2(P_n)} < \alpha_i$ . Let  $\hat{f}_0 = 0$  and for any  $N$ , we can express  $f$  by chaining as

$$f = f - \hat{f}_N + \sum_{i=1}^N (\hat{f}_i - \hat{f}_{i-1}).$$

Hence for any  $N$ , we can express the empirical Rademacher complexity as

$$\begin{aligned} \hat{\mathcal{R}}_n(\mathcal{F}) &= \frac{1}{n} \mathbb{E}_\epsilon \sup_{f \in \mathcal{F}} \sum_{i=1}^n \epsilon_i \left( f(X_i) - \hat{f}_N(X_i) + \sum_{j=1}^N (\hat{f}_j(X_i) - \hat{f}_{j-1}(X_i)) \right) \\ &\leq \frac{1}{n} \mathbb{E}_\epsilon \sup_{f \in \mathcal{F}} \sum_{i=1}^n \epsilon_i \left( f(X_i) - \hat{f}_N(X_i) \right) + \sum_{i=1}^n \frac{1}{n} \mathbb{E}_\epsilon \sup_{f \in \mathcal{F}} \sum_{j=1}^N \epsilon_i \left( \hat{f}_j(X_i) - \hat{f}_{j-1}(X_i) \right) \\ &\leq \|\epsilon\|_{L_2(P_n)} \sup_{f \in \mathcal{F}} \|f - \hat{f}_N\|_{L_2(P_n)} + \sum_{i=1}^n \frac{1}{n} \mathbb{E}_\epsilon \sup_{f \in \mathcal{F}} \sum_{j=1}^N \epsilon_i \left( \hat{f}_j(X_i) - \hat{f}_{j-1}(X_i) \right) \\ &\leq \alpha_N + \sum_{i=1}^n \frac{1}{n} \mathbb{E}_\epsilon \sup_{f \in \mathcal{F}} \sum_{j=1}^N \epsilon_i \left( \hat{f}_j(X_i) - \hat{f}_{j-1}(X_i) \right), \end{aligned}$$

where  $\epsilon = (\epsilon_1, \dots, \epsilon_n)$  and the second-to-last inequality is due to Cauchy–Schwarz. Now the second term is the summation of empirical Rademacher complexity w.r.t. the function classes  $\{f' - f'' : f' \in T_j, f'' \in T_{j-1}\}, j = 1, \dots, N$ . Note that

$$\begin{aligned} \|\hat{f}_j - \hat{f}_{j-1}\|_{L_2(P_n)}^2 &\leq \left( \|\hat{f}_j - f\|_{L_2(P_n)} + \|f - \hat{f}_{j-1}\|_{L_2(P_n)} \right)^2 \\ &\leq (\alpha_j + \alpha_{j-1})^2 \\ &= 3\alpha_j^2. \end{aligned}$$

Massart’s lemma (Mohri et al., 2018, Theorem 3.7) states that if for any finite function class  $\mathcal{F}$ ,  $\sup_{f \in \mathcal{F}} \|f\|_{L_2(P_n)} \leq M$ , then we have

$$\hat{\mathcal{R}}_n(\mathcal{F}) \leq \sqrt{\frac{2M^2 \log(|\mathcal{F}|)}{n}}.$$

Applying Massart’s lemma to the function classes  $\{f' - f'' : f' \in T_j, f'' \in T_{j-1}\}, j = 1, \dots, N$ , we get that for any  $N$ ,

$$\begin{aligned} \hat{\mathcal{R}}_n(\mathcal{F}) &\leq \alpha_N + \sum_{j=1}^N 3\alpha_j \sqrt{\frac{2 \log(|T_j| \cdot |T_{j-1}|)}{n}} \\ &\leq \alpha_N + 6 \sum_{j=1}^N \alpha_j \sqrt{\frac{\log(|T_j|)}{n}} \\ &\leq \alpha_N + 12 \sum_{j=1}^N (\alpha_j - \alpha_{j+1}) \sqrt{\frac{\log \mathcal{N}(\alpha_j, \mathcal{F}, L_2(P_n))}{n}} \\ &\leq \alpha_N + 12 \int_{\alpha_{N+1}}^{\alpha_0} \sqrt{\frac{\log \mathcal{N}(r, \mathcal{F}, L_2(P_n))}{n}} dr, \end{aligned}$$

where the third inequality is due to  $2(\alpha_j - \alpha_{j+1}) = \alpha_j$ . Now for any small  $\delta > 0$  we can choose  $N$  such that  $\alpha_{N+1} \leq \delta < \alpha_N$ . Hence,

$$\hat{\mathcal{R}}_n(\mathcal{F}) \leq 2\delta + 12 \int_{\delta/2}^M \sqrt{\frac{\log \mathcal{N}(r, \mathcal{F}, L_2(P_n))}{n}} dr.$$

Since  $\delta > 0$  is arbitrary, we can take  $\inf$  w.r.t.  $\delta$  to get

$$\hat{\mathcal{R}}_n(\mathcal{F}) \leq \inf_{0 < \delta < M} \left( 4\delta + 12 \int_{\delta}^M \sqrt{\frac{\log \mathcal{N}(r, \mathcal{F}, L_2(P_n))}{n}} dr \right).$$

The result follows due to the fact that

$$\mathcal{N}(r, \mathcal{F}, L_2(P_n)) \leq \mathcal{N}(\epsilon, \mathcal{F}, L_{\infty}(P_n)) \leq \mathcal{N}(\epsilon, \mathcal{F}, \|\cdot\|_{\infty}).$$

□

## G Proof of Theorem 3.1

*Proof.* Taking  $W_1 L_1 = \lceil \sqrt{n} \rceil$ , Shen et al. (2019, Theorem 4.3) gives rise to  $\mathcal{E}_1 = O(\sqrt{dn}^{-\frac{1}{d+1}})$ . The range of  $g$  and  $e$  covers the supports of  $\mu$  and  $\nu$ , respectively, hence Theorem 4.3 leads to  $\mathcal{E}_2 = 0$ . By Lemma C.2, we have

$$\log \mathcal{N}(\epsilon, \mathcal{F}^1, \|\cdot\|_{\infty}) \leq \left( \frac{8\sqrt{2(d+1)M}}{\epsilon} \right)^{d+1} \log \frac{16B}{\epsilon}.$$

Now following the same procedure as in Section E by taking  $\delta = 8\sqrt{2(d+1)n}^{-\frac{1}{d+1}} (\log n)^{\frac{1}{d+1}}$ , we have

$$\max\{\mathbb{E}\mathcal{E}_3, \mathbb{E}\mathcal{E}_4\} = O\left(\sqrt{dn}^{-\frac{1}{d+1}} (\log n)^{\frac{1}{d+1}}\right).$$

At last, we consider all four error terms simultaneously.

$$\begin{aligned} \mathbb{E}d_{\mathcal{F}^1}(\hat{\nu}, \hat{\mu}) &\leq \mathcal{E}_1 + \mathcal{E}_2 + \mathbb{E}\mathcal{E}_4 + \mathbb{E}\mathcal{E}_3 \\ &= O(\sqrt{dn}^{-\frac{1}{d+1}} + 0 + \sqrt{dn}^{-\frac{1}{d+1}} (\log n)^{\frac{1}{d+1}}) \\ &= O(\sqrt{dn}^{-\frac{1}{d+1}} (\log n)^{\frac{1}{d+1}}). \end{aligned}$$

□

## H Proof of Theorem 3.3

Following the same proof as Theorem 4.3, we have the following theorem.

**Theorem H.1.** *Suppose  $\nu$  supported on  $\mathbb{R}^k$  and  $\mu$  supported on  $\mathbb{R}^d$  are both absolutely continuous w.r.t. Lebesgue measure, and  $z'_i$ s and  $x'_i$ s are i.i.d. samples from  $\nu$  and  $\mu$ , respectively for  $1 \leq i \leq n$ . Then there exist generator and encoder neural network functions  $g : \mathbb{R}^k \mapsto \mathbb{R}^d$  and  $e : \mathbb{R}^d \mapsto \mathbb{R}^k$  such that  $g$  and  $e$  are inverse bijections of each other between  $\{z_i : 1 \leq i \leq n\}$  and  $\{x_i : 1 \leq i \leq n\}$ . Moreover, such neural network functions  $g$  and  $e$  can be obtained by properly specifying  $W_2^2 L_2 = c_2 dn$  and  $W_3^2 L_3 = c_3 kn$  for some constant  $12 \leq c_2, c_3 \leq 384$ .*

Since  $\mu$  and  $\nu$  are absolutely continuous by assumption, they are also absolutely continuous in any one dimension. Hence the proof reduces to the one-dimensional case.

## I Additional Lemma

Denote  $\mathcal{S}^d(z_0, \dots, z_{N+1})$  as the set of all continuous piecewise linear functions  $f : \mathbb{R} \mapsto \mathbb{R}^d$  which have breakpoints only at  $z_0 < z_1 < \dots < z_N < z_{N+1}$  and are constant on  $(-\infty, z_0)$  and  $(z_{N+1}, \infty)$ . The following lemma is a result in Yang et al. (2021).

**Lemma I.1.** *Suppose that  $W \geq 7d + 1$ ,  $L \geq 2$  and  $N \leq (W - d - 1) \lfloor \frac{W-d-1}{6d} \rfloor \lfloor \frac{L}{2} \rfloor$ . Then for any  $z_0 < z_1 < \dots < z_N < z_{N+1}$ ,  $\mathcal{S}^d(z_0, \dots, z_{N+1})$  can be represented by a ReLU FNNs with width and depth no larger than  $W$  and  $L$ , respectively.*

This result indicates that the expressive capacity of ReLU FNNs for piecewise linear functions. If we choose  $N = (W - d - 1) \lfloor \frac{W-d-1}{6d} \rfloor \lfloor \frac{L}{2} \rfloor$ , a simple calculation shows  $cW^2 L/d \leq N \leq CW^2 L/d$  with  $c = 1/384$  and  $C = 1/12$ . This means when the number of breakpoints are moderate compared with the network structure, such piecewise linear functions are expressible by feedforward ReLU networks.



## References

- Chen, M., Liao, W., Zha, H., and Zhao, T. (2020). Statistical guarantees of generative adversarial networks for distribution estimation. *arXiv preprint arXiv:2002.03938*.
- Dudley, R. (1967). The sizes of compact subsets of hilbert space and continuity of gaussian processes. *Journal of Functional Analysis*, 1(3):290–330.
- Gottlieb, L.-A., Kontorovich, A., and Krauthgamer, R. (2013). Efficient regression in metric spaces via approximate lipschitz extension. In *International Workshop on Similarity-Based Pattern Recognition*, pages 43–58. Springer.
- Liang, T. (2020). How well generative adversarial networks learn distributions.
- Mohri, M., Rostamizadeh, A., and Talwalkar, A. (2018). *Foundations of machine learning*. MIT press.
- Schreuder, N. (2020). Bounding the expectation of the supremum of empirical processes indexed by hölder classes.
- Shen, Z., Yang, H., and Zhang, S. (2019). Deep network approximation characterized by number of neurons. *arXiv preprint arXiv:1906.05497*.
- Srebro, N. and Sridharan, K. (2010). Note on refined dudley integral covering number bound. *Unpublished results*. <http://ttic.uchicago.edu/karthik/dudley.pdf>.
- Van der Vaart, A. W. and Wellner, J. A. (1996). Weak convergence. In *Weak convergence and empirical processes*. Springer.
- Yang, Y., Li, Z., and Wang, Y. (2021). On the capacity of deep generative networks for approximating distributions. *arXiv preprint arXiv:2101.12353*.
